# Supplementary material for: Inconsistent centralised versus non-centralised ischaemic stroke aetiology
Source: HighWire-hosted journal article supplement (doi:10.1136/svn-2020-000576), 2020-11-05
Supplement: svn-2020-000576supp003_data_supplement.pdf [file svn-2020-000576supp003_data_supplement.pdf]

---

**Supplemental Materials**

|                                                                                                                                                                      |    |
|----------------------------------------------------------------------------------------------------------------------------------------------------------------------|----|
| Table I. Demographic and clinical characteristics of included versus excluded participants.....                                                                      | 2  |
| Table II. Baseline characteristics of the study population .....                                                                                                     | 4  |
| Table III. Univariate analysis of potential causes of inconsistency between non-centralised and centralised aetiologic sub-classification of the study population.   | 6  |
| Table IV. Medication of patients categorised based on the consistency of centralised and discharge subtype in the subgroup with complete information .               | 22 |
| Table V. Oral anticoagulant treatment of cardioembolic stroke patients received with unchanged and reassigned subtype in the subgroup with complete information..... | 25 |
| Supplementary Methods.....                                                                                                                                           | 27 |
| Supplementary Materials-Screening Report Form (separate file).....                                                                                                   | 28 |
| Supplementary Materials-Decision Algorithm (separate file).....                                                                                                      | 28 |

**Table I. Demographic and clinical characteristics of included versus excluded participants.**

| <b>Characteristics</b>                   | <b>Included (n=12180)</b> | <b>Excluded (n=2986)</b> | <b>P-value</b> |
|------------------------------------------|---------------------------|--------------------------|----------------|
| Age, y, median (IQR)                     | 63 (54–70)                | 62 (53–70)               | 0.012          |
| Women, n (%)                             | 3818 (31.35%)             | 984 (32.95%)             | 0.091          |
| mRS prior to current event, median (IQR) | 0 (0–1)                   | 0 (0–0)                  | <0.001         |
| BMI, median (IQR), kg/m <sup>2</sup>     | 24.49 (22.58–26.57)       | 24.49 (22.75–26.42)      | 0.875          |
| Medical history, n (%)                   |                           |                          |                |
| Ischaemic stroke                         | 2495 (20.48%)             | 654 (21.90%)             | 0.087          |
| TIA                                      | 257 (2.11%)               | 159 (5.32%)              | <0.001         |
| Myocardial infarction                    | 1213 (9.96%)              | 395 (13.23%)             | <0.001         |
| Known atrial fibrillation or flutter     | 827 (6.79%)               | 192 (6.43%)              | 0.482          |
| Hypertension                             | 7675 (63.01%)             | 1819 (60.92%)            | 0.034          |
| Dyslipidaemia                            | 923 (7.58%)               | 268 (8.98%)              | 0.011          |
| Diabetes mellitus                        | 2812 (23.09%)             | 698 (23.38%)             | 0.737          |
| Current or previous smoker, n (%)        | 4427 (36.35%)             | 985 (32.99%)             | <0.001         |
| Baseline blood pressure, mmHg            |                           |                          |                |
| <140/90                                  | 2580 (21.18%)             | 829 (27.76%)             | <0.001         |

---

|                                    |                |               |        |
|------------------------------------|----------------|---------------|--------|
| Baseline NIHSS score, median (IQR) | 3 (2–6)        | 2 (0–5)       | <0.001 |
| Admitting diagnosis, n (%)         |                |               | <0.001 |
| Ischaemic stroke                   | 11897 (97.68%) | 2085 (69.83%) |        |
| TIA                                | 283 (2.32%)    | 901 (30.17%)  |        |

---

IQR, interquartile range; mRS, modified Rankin Scale; BMI, body mass index; NIHSS, NIH Stroke Scale.

**Table II. Baseline characteristics of the study population**

| <b>Characteristics</b>                   | <b>Study population (n=12180)</b> |
|------------------------------------------|-----------------------------------|
| Age, y, median (IQR)                     | 63 (54-70)                        |
| Women, n (%)                             | 3818 (31.4%)                      |
| mRS prior to current event, median (IQR) | 0 (0-1)                           |
| BMI, median (IQR), kg/m <sup>2</sup>     | 24.5 (22.6-26.6)                  |
| Medical history, n (%)                   |                                   |
| Ischaemic stroke                         | 2495 (20.5%)                      |
| TIA                                      | 257 (2.1%)                        |
| Myocardial infarction                    | 1213 (10.0%)                      |
| Known atrial fibrillation or flutter     | 827 (6.8%)                        |
| Hypertension                             | 7675 (63.0%)                      |
| Dyslipidaemia                            | 923 (7.6%)                        |
| Diabetes mellitus                        | 2812 (23.1%)                      |
| Current or previous smoker, n (%)        | 3897 (32.0%)                      |
| Baseline blood pressure, mmHg            |                                   |
| <140/90                                  | 2850 (21.2%)                      |
| Baseline NIHSS score, median (IQR)       | 3 (2-6)                           |
| Brain imaging                            | 12180 (100%)                      |
| DWI                                      | 12180 (100%)                      |
| Evaluation of intracranial artery        | 11586 (95.1%)                     |
| MRA                                      | 10251 (88.5%)                     |
| CTA                                      | 1287 (11.1%)                      |

---

|                                   |               |
|-----------------------------------|---------------|
| DSA                               | 48 (0.4%)     |
| Evaluation of extracranial artery | 11454 (94.0%) |
| Carotid artery doppler            | 9360 (81.6%)  |
| CTA                               | 1164 (10.2%)  |
| CE-MRA                            | 860 (7.5%)    |
| DSA                               | 70 (0.6%)     |
| Evaluation of cardiac rhythm      |               |
| EKG                               | 11150 (94.3%) |
| Holter                            | 9884 (83.6%)  |
| Evaluation of cardiac structure   |               |
| TTE                               | 11219 (94.7%) |
| TEE                               | 11 (0.09%)    |

---

IQR, interquartile range; mRS, modified Rankin Scale; BMI, body mass index; NIHSS, NIH Stroke Scale; MRA, Magnetic Resonance Angiography; CTA, computed tomography angiography; DSA, digital subtraction angiography; CE-MRA, contrast-enhanced magnetic resonance angiography; TTE, transthoracic echocardiography; TEE, transoesophageal echocardiography.

**Table III. Univariate analysis of potential causes of inconsistency between non-centralised and centralised aetiologic sub-classification of the study population.**

LAA:

| Variable                                 | Consistent LAA (n=2517) | Centrally reassigned LAA (n=4886) | Newly diagnosed LAA (n=735) | P-value |
|------------------------------------------|-------------------------|-----------------------------------|-----------------------------|---------|
| Age, y, median (IQR)                     | 63 (55–70)              | 63 (55–71)                        | 63 (55–70)                  | 0.452   |
| Women, n (%)                             | 773 (30.7%)             | 1496 (30.6%)                      | 232 (31.6%)                 | 0.874   |
| mRS prior to current event, median (IQR) | 0 (0–1)                 | 0 (0–1)                           | 0 (0–1)                     | 0.239   |
| BMI, median (IQR), kg/m <sup>2</sup>     | 24.49 (22.60–26.57)     | 24.47 (22.60–26.42)               | 24.56 (22.58–26.81)         | 0.248   |
| Medical history, n (%)                   |                         |                                   |                             |         |
| Ischaemic stroke                         | 618 (24.6%)             | 1037 (21.2%)                      | 150 (20.4%)                 | 0.002   |
| TIA                                      | 84 (3.3%)               | 101 (2.1%)                        | 15 (2.0%)                   | 0.003   |
| Myocardial infarction                    | 290 (11.5%)             | 486 (1.0%)                        | 64 (8.7%)                   | 0.035   |
| Known atrial fibrillation or flutter     | 0 (0%)                  | 270 (5.5%)                        | 0 (0%)                      | <0.001  |
| Hypertension                             | 1661 (66.0%)            | 3121 (63.9%)                      | 470 (64.0%)                 | 0.186   |
| Dyslipidaemia                            | 225 (9.0%)              | 360 (7.4%)                        | 53 (7.2%)                   | 0.047   |
| Diabetes mellitus                        | 661 (26.2%)             | 1178 (24.1%)                      | 169 (23.0%)                 | 0.068   |

|                                    |              |              |             |        |
|------------------------------------|--------------|--------------|-------------|--------|
| Current or previous smoker, n (%)  | 932(37.0%)   | 1779(36.4%)  | 248(33.8%)  | 0.263  |
| Baseline blood pressure, mmHg      |              |              |             |        |
| <140/90                            | 1990 (79.1%) | 3887 (79.6%) | 568 (77.3%) | 0.359  |
| Baseline NIHSS score, median (IQR) | 4 (2–8)      | 4 (2–6)      | 3 (1–5)     | <0.01  |
| Inpatient department (n, %)        |              |              |             |        |
| Stroke unit                        | 527 (20.9%)  | 1121 (23.0%) | 158 (21.5%) | 0.129  |
| General neurological ward          | 1887 (75.0%) | 3569 (73.1%) | 537 (73.1%) | 0.191  |
| Neurosurgical ward                 | 3 (0.1%)     | 7 (0.1%)     | 2 (0.3%)    | 0.632  |
| Neurointerventional ward           | 0 (0%)       | 10 (0.2%)    | 0 (0%)      | 0.036  |
| Neuro-ICU                          | 53 (2.1%)    | 104 (2.1%)   | 17 (2.3%)   | 0.941  |
| ICU                                | 22 (0.9%)    | 44 (0.9%)    | 15 (2.0%)   | 0.011  |
| General medical ward               | 43 (1.7%)    | 95 (1.9%)    | 10 (1.4%)   | 0.480  |
| Geological region                  |              |              |             | <0.001 |
| West                               | 170 (6.8%)   | 365 (7.5%)   | 93 (12.7%)  |        |
| Middle                             | 943 (37.5%)  | 1863 (38.1%) | 249 (33.9%) |        |
| East                               | 1404 (55.8%) | 2658 (54.4%) | 393 (53.5%) |        |
| Area                               |              |              |             | 0.001  |

|                                   |              |              |             |        |
|-----------------------------------|--------------|--------------|-------------|--------|
| Rural                             | 545 (21.7%)  | 990 (20.3%)  | 192 (26.1%) |        |
| Urban                             | 1972 (78.4%) | 3896 (79.7%) | 543 (73.9%) |        |
| Hospital type                     |              |              |             | 0.020  |
| Secondary                         | 305 (12.1%)  | 667 (13.7%)  | 117 (15.9%) |        |
| Tertiary                          | 2212 (87.9%) | 4219 (86.4%) | 618 (84.1%) |        |
| Evaluation of intracranial artery |              |              |             | 0.003  |
| MRA                               | 2203 (88.1%) | 4049 (89.8%) | 632 (86.5%) |        |
| CTA                               | 277 (11.1%)  | 449 (10.0%)  | 95 (13.0%)  |        |
| DSA                               | 20 (0.9%)    | 13 (0.3%)    | 4 (0.6%)    |        |
| Evaluation of extracranial artery |              |              |             | <0.001 |
| Carotid artery doppler            | 1898 (78.7%) | 3736 (82.0%) | 546 (78.7%) |        |
| CTA                               | 282 (11.7%)  | 380 (8.3%)   | 102 (14.7%) |        |
| CE-MRA                            | 199 (8.3%)   | 419 (9.2%)   | 40 (5.8%)   |        |
| DSA                               | 28 (1.2%)    | 18 (0.4%)    | 5 (0.7%)    |        |
| Evaluation of cardiac rhythm      |              |              |             |        |
| EKG                               | 2300 (94.9%) | 4461 (94.2%) | 685 (94.9%) | 0.499  |



---

|                                 |              |              |             |       |
|---------------------------------|--------------|--------------|-------------|-------|
| Holter                          | 2018 (83.3%) | 3899 (82.3%) | 622 (85.9%) | 0.051 |
| Evaluation of cardiac structure |              |              |             |       |
| TTE                             | 2297 (94.8%) | 4450 (93.8%) | 692 (95.7%) | 0.051 |
| TEE                             | 0 (0%)       | 0 (0%)       | 0 (0%)      | NE    |

---

## CE:

| Variables                                | Consistent CE (n=284) | Centrally reassigned CE (n=266) | Newly diagnosed CE (n=449) | P value |
|------------------------------------------|-----------------------|---------------------------------|----------------------------|---------|
| Age, y, median (IQR)                     | 71.0 (62.0–77.0)      | 66.5 (57.0–76.0)                | 70.0 (63.0–77.0)           | 0.001   |
| Women, n (%)                             | 99 (34.9%)            | 119 (44.7%)                     | 171 (38.1%)                | 0.053   |
| mRS prior to current event, median (IQR) | 0 (0–0)               | 0 (0–1)                         | 0 (0–1)                    | 0.081   |
| BMI, median (IQR), kg/m <sup>2</sup>     | 24.0 (21.5–26.1)      | 24.0 (21.8–26.1)                | 24.2 (22.5–26.1)           | 0.238   |
| Medical history, n (%)                   |                       |                                 |                            |         |
| Ischaemic stroke                         | 60 (21.1%)            | 51 (19.2%)                      | 97 (21.6%)                 | 0.733   |
| TIA                                      | 2 (0.7%)              | 3 (1.1%)                        | 4 (0.9%)                   | 0.871   |
| Myocardial infarction                    | 50 (17.6%)            | 60 (22.6%)                      | 84 (18.7%)                 | 0.300   |
| Known atrial fibrillation or flutter     | 261 (91.9%)           | 160 (60.2%)                     | 234 (52.1%)                | <0.001  |
| Hypertension                             | 149 (52.5%)           | 143 (53.8%)                     | 286 (63.7%)                | 0.003   |
| Dyslipidaemia                            | 9 (3.2%)              | 14 (5.3%)                       | 30 (6.7%)                  | 0.118   |
| Diabetes mellitus                        | 40 (14.1%)            | 46 (17.3%)                      | 103 (23.0%)                | 0.009   |
| Current or previous smoker, n (%)        | 74 (26.1%)            | 80 (30.1%)                      | 125 (27.8%)                | 0.575   |
| Baseline blood pressure, mmHg            |                       |                                 |                            |         |

|                                    |             |             |             |        |
|------------------------------------|-------------|-------------|-------------|--------|
| <140/90                            | 210 (73.9%) | 191 (71.8%) | 345 (76.8%) | 0.309  |
| Baseline NIHSS score, median (IQR) | 4 (2–8)     | 5 (2–10)    | 4 (2–7)     | <0.001 |
| Inpatient department (n, %)        |             |             |             |        |
| Stroke unit                        | 82 (29.0%)  | 64 (24.1%)  | 114 (25.4%) | 0.402  |
| General neurological ward          | 178 (62.7%) | 178 (67.0%) | 314 (69.9%) | 0.125  |
| Neurosurgical ward                 | 1 (0.4%)    | 0 (0%)      | 0 (0%)      | 0.284  |
| Neurointerventional ward           | 0 (0%)      | 1 (0.4%)    | 1 (0.2%)    | 0.609  |
| Neuro-ICU                          | 21 (7.4%)   | 14 (5.3%)   | 10 (2.2%)   | 0.004  |
| ICU                                | 4 (1.4%)    | 9 (3.4%)    | 9 (2.0%)    | 0.268  |
| General medical ward               | 5 (1.8%)    | 3 (1.1%)    | 6 (1.3%)    | 0.809  |
| Geological region                  |             |             |             |        |
| West                               | 41 (14.4%)  | 41 (15.4%)  | 45 (10.2%)  | 0.010  |
| Middle                             | 75 (26.4%)  | 94 (35.3%)  | 128 (28.5%) |        |
| East                               | 168 (59.2%) | 131 (49.3%) | 276 (61.5%) |        |
| Area                               |             |             |             |        |
| Rural                              | 50 (17.6%)  | 42 (15.8%)  | 81 (18.0%)  | 0.736  |
| Urban                              | 234 (82.4%) | 224 (84.2%) | 368 (82.0%) |        |

|                                   |             |             |             |       |
|-----------------------------------|-------------|-------------|-------------|-------|
| Hospital type                     |             |             |             | 0.047 |
| Secondary                         | 20 (7.1%)   | 17 (6.4%)   | 50 (11.1%)  |       |
| Tertiary                          | 264 (93.0%) | 249 (93.6%) | 399 (88.9%) |       |
| Evaluation of intracranial artery |             |             |             | 0.035 |
| MRA                               | 225 (86.5%) | 217 (83.1%) | 367 (90.8%) |       |
| CTA                               | 34 (13.1%)  | 44 (16.9%)  | 36 (8.9%)   |       |
| DSA                               | 1 (0.4%)    | 0 (0%)      | 1 (0.3%)    |       |
| Evaluation of extracranial artery |             |             |             | 0.004 |
| Carotid artery doppler            | 211 (79.0%) | 185 (74.0%) | 346 (84.4%) |       |
| CTA                               | 29 (10.9%)  | 40 (16.0%)  | 25 (6.1%)   |       |
| CE-MRA                            | 23 (8.6%)   | 23 (9.2%)   | 37 (9.0%)   |       |
| DSA                               | 4 (1.5%)    | 2 (0.8%)    | 2 (0.5%)    |       |
| Evaluation of cardiac rhythm      |             |             |             |       |
| EKG                               | 268 (96.4%) | 243 (93.1%) | 419 (96.8%) | 0.056 |
| Holter                            | 245 (87.8%) | 229 (87.7%) | 358 (82.1%) | 0.046 |
| Evaluation of cardiac structure   |             |             |             |       |
| TTE                               | 271 (97.1%) | 246 (93.9%) | 416 (95.4%) | 0.191 |

---

|     |        |        |        |    |
|-----|--------|--------|--------|----|
| TEE | 0 (0%) | 0 (0%) | 0 (0%) | NE |
|-----|--------|--------|--------|----|

---

## SVO:

| Variables                                | Consistent SVO (n=1193) | Centrally reassigned SVO (n=2003) | Newly diagnosed SVO (n=1749) | P value |
|------------------------------------------|-------------------------|-----------------------------------|------------------------------|---------|
| Age, y, median (IQR)                     | 61 (53–68)              | 62 (54–69)                        | 62 (54–69)                   | <0.001  |
| Women, n (%)                             | 362 (30.3%)             | 659 (33.0%)                       | 472 (27.0%)                  | <0.001  |
| mRS prior to current event, median (IQR) | 0 (0–0)                 | 0 (0–0)                           | 0 (0–1)                      | <0.001  |
| BMI, median (IQR), kg/m <sup>2</sup>     | 24.8 (23.0–26.9)        | 24.6 (22.6–26.7)                  | 24.5 (22.9–26.4)             | 0.099   |
| Medical history, n (%)                   |                         |                                   |                              |         |
| Ischaemic stroke                         | 220 (18.4%)             | 346 (17.3%)                       | 363 (20.8%)                  | 0.023   |
| TIA                                      | 16 (1.3%)               | 37 (1.9%)                         | 26 (1.5%)                    | 0.489   |
| Myocardial infarction                    | 87 (7.3%)               | 163 (8.1%)                        | 124 (7.1%)                   | 0.442   |
| Known atrial fibrillation or flutter     | 0 (0%)                  | 65 (3.3%)                         | 0 (0%)                       | <0.001  |
| Hypertension                             | 762 (63.9%)             | 1244 (62.1%)                      | 1156 (66.1%)                 | 0.040   |
| Dyslipidaemia                            | 103 (8.6%)              | 138 (6.9%)                        | 118 (6.8%)                   | 0.109   |
| Diabetes mellitus                        | 249 (20.9%)             | 431 (21.5%)                       | 460 (26.3%)                  | <0.001  |
| Current or previous smoker, n (%)        | 490 (41.1%)             | 707 (35.3%)                       | 672 (38.4%)                  | 0.004   |
| Baseline blood pressure, mmHg            |                         |                                   |                              |         |

|                                    |             |              |              |        |
|------------------------------------|-------------|--------------|--------------|--------|
| <140/90                            | 970 (81.3%) | 1582 (79.0%) | 1421 (81.3%) | 0.138  |
| Baseline NIHSS score, median (IQR) | 2 (1–4)     | 3 (1–5)      | 3 (1–5)      | <0.001 |
| Inpatient department (n, %)        |             |              |              |        |
| Stroke unit                        | 250 (21.0%) | 421 (21.0%)  | 390 (22.3%)  | 0.565  |
| General neurological ward          | 922 (77.3%) | 1524 (76.1%) | 1292 (73.9%) | 0.085  |
| Neurosurgical ward                 | 1 (0.1%)    | 6 (0.3%)     | 1 (0.1%)     | 0.136  |
| Neurointerventional ward           | 0 (0%)      | 1 (0.1%)     | 3 (0.2%)     | 0.225  |
| Neuro-ICU                          | 13 (1.1%)   | 28 (1.4%)    | 32 (1.8%)    | 0.245  |
| ICU                                | 3 (0.3%)    | 22 (1.1%)    | 16 (0.9%)    | 0.034  |
| General medical ward               | 9 (0.8%)    | 22 (1.1%)    | 35 (2.0%)    | 0.007  |
| Geological region                  |             |              |              |        |
| West                               | 104 (8.7%)  | 142 (7.1%)   | 157 (9.0%)   | 0.006  |
| Middle                             | 424 (35.5%) | 714 (35.7%)  | 688 (39.3%)  |        |
| East                               | 665 (55.7%) | 1147 (57.3%) | 904 (51.7%)  |        |
| Area                               |             |              |              |        |
| Rural                              | 410 (34.4%) | 679 (33.9%)  | 338 (19.3%)  | <0.001 |
| Urban                              | 783 (65.6%) | 1324 (66.1%) | 1411 (80.7%) |        |

|                                   |              |              |              |        |
|-----------------------------------|--------------|--------------|--------------|--------|
| Hospital type                     |              |              |              | <0.001 |
| Secondary                         | 220 (18.4%)  | 400 (20.0%)  | 236 (13.5%)  |        |
| Tertiary                          | 973 (81.6%)  | 1603 (80.0%) | 1513 (86.5%) |        |
| Evaluation of intracranial artery |              |              |              | 0.13   |
| MRA                               | 1050 (91.1%) | 1704 (88.7%) | 1479 (90.4%) |        |
| CTA                               | 101 (8.8%)   | 213 (11.1%)  | 151 (9.2%)   |        |
| DSA                               | 2 (0.2%)     | 5 (0.3%)     | 7 (0.4%)     |        |
| Evaluation of extracranial artery |              |              |              | <0.001 |
| Carotid artery doppler            | 1009 (88.1%) | 1586 (83.9%) | 1376 (82.8%) |        |
| CTA                               | 92 (8.0%)    | 192 (10.2%)  | 142 (8.5%)   |        |
| CE-MRA                            | 42 (3.7%)    | 105 (5.6%)   | 134 (8.1%)   |        |
| DSA                               | 2 (0.2%)     | 8 (0.4%)     | 10 (0.6%)    |        |
| Evaluation of cardiac rhythm      |              |              |              |        |
| EKG                               | 1098 (94.7%) | 1870 (95.8%) | 1614 (94.7%) | 0.234  |
| Holter                            | 1004 (86.6%) | 1695 (86.7%) | 1400 (82.2%) | <0.001 |
| Evaluation of cardiac structure   |              |              |              |        |
| TTE                               | 1140 (97.9%) | 1885 (96.3%) | 1607 (94.1%) | <0.001 |



---

|     |        |        |        |    |
|-----|--------|--------|--------|----|
| TEE | 0 (0%) | 0 (0%) | 0 (0%) | NE |
|-----|--------|--------|--------|----|

---

## OE:

| Variables                                | Consistent OE (n=20) | Centrally reassigned OE (n=451) | Newly diagnosed OE (n=144) | P value |
|------------------------------------------|----------------------|---------------------------------|----------------------------|---------|
| Age, y, median (IQR)                     | 54.5 (41.0–63.5)     | 62.0 (53.0–70.0)                | 61.0 (50.5–68.0)           | 0.033   |
| Women, n (%)                             | 10 (50%)             | 126 (27.9%)                     | 65 (45.1%)                 | <0.001  |
| mRS prior to current event, median (IQR) | 0 (0–0)              | 0 (0–1)                         | 0 (0–1)                    | 0.350   |
| BMI, median (IQR), kg/m <sup>2</sup>     | 21.8(20.1–26.2)      | 24.2(22.5–26.3)                 | 24.2(22.5–26.4)            | 0.070   |
| Medical history, n (%)                   |                      |                                 |                            |         |
| Ischaemic stroke                         | 4 (20%)              | 69 (15.3%)                      | 25 (17.4%)                 | 0.740   |
| TIA                                      | 1 (5%)               | 7 (1.6%)                        | 6 (4.2%)                   | 0.132   |
| Myocardial infarction                    | 1 (5%)               | 34 (7.5%)                       | 10 (6.9%)                  | 0.896   |
| Known atrial fibrillation or flutter     | 0 (0%)               | 29 (6.4%)                       | 0 (0%)                     | 0.004   |
| Hypertension                             | 12 (60.0%)           | 282 (62.5%)                     | 85 (59.0%)                 | 0.745   |
| Dyslipidaemia                            | 1 (5%)               | 33 (7.3%)                       | 7 (4.9%)                   | 0.563   |
| Diabetes mellitus                        | 3 (15%)              | 110 (24.4%)                     | 29 (20.1%)                 | 0.392   |
| Current or previous smoker, n (%)        | 4 (20%)              | 153 (33.9%)                     | 47 (32.6%)                 | 0.428   |
| Baseline blood pressure, mmHg            |                      |                                 |                            |         |

|                                    |                |               |               |       |
|------------------------------------|----------------|---------------|---------------|-------|
| <140/90                            | 13 (65%)       | 341 (75.6%)   | 102 (70.8%)   | 0.333 |
| Baseline NIHSS score, median (IQR) | 3.5 (1.5–10.0) | 3.0 (1.0–5.0) | 3.0 (2.0–6.0) | 0.078 |
| Inpatient department (n, %)        |                |               |               |       |
| Stroke unit                        | 7 (35.0%)      | 135 (30.0%)   | 27 (18.6%)    | 0.024 |
| General neurological ward          | 13 (65%)       | 288 (63.9%)   | 114 (79.2%)   | 0.003 |
| Neurosurgical ward                 | 0 (0%)         | 0 (0%)        | 1 (0.7%)      | 0.20  |
| Neurointerventional ward           | 0 (0%)         | 0 (0%)        | 0 (0%)        | NA    |
| Neuro-ICU                          | 0 (0%)         | 15 (3.3%)     | 3 (2.1%)      | 0.544 |
| ICU                                | 0 (0%)         | 12 (2.7%)     | 1 (0.7%)      | 0.289 |
| General medical ward               | 0 (0%)         | 6 (1.3%)      | 1 (0.7%)      | 0.73  |
| Geological region                  |                |               |               |       |
| West                               | 1 (5%)         | 95 (21.1%)    | 15 (10.4%)    | 0.016 |
| Middle                             | 7 (35%)        | 97 (21.5%)    | 40 (27.8%)    |       |
| East                               | 12 (60%)       | 259 (57.4%)   | 89 (61.8%)    |       |
| Area                               |                |               |               |       |
| Rural                              | 3 (15.0%)      | 44 (9.8%)     | 20 (13.9%)    | 0.32  |
| Urban                              | 17 (85.0%)     | 407 (90.2%)   | 124 (86.1%)   |       |

|                                   |            |             |             |       |
|-----------------------------------|------------|-------------|-------------|-------|
| Hospital type                     |            |             |             | 0.42  |
| Secondary                         | 1 (5%)     | 36 (8.0%)   | 7 (4.9%)    |       |
| Tertiary                          | 19 (95%)   | 415 (92.0%) | 137 (95.1%) |       |
| Evaluation of intracranial artery |            |             |             | 0.229 |
| MRA                               | 12 (60.0%) | 333 (79.3%) | 105 (79.6%) |       |
| CTA                               | 8 (40.0%)  | 81 (19.3%)  | 26 (19.7%)  |       |
| DSA                               | 0 (0%)     | 6 (1.4%)    | 1 (0.8%)    |       |
| Evaluation of extracranial artery |            |             |             | 0.284 |
| Carotid artery doppler            | 12 (66.7%) | 311 (76.2%) | 98 (72.1%)  |       |
| CTA                               | 6 (33.3%)  | 72 (17.7%)  | 24 (17.7%)  |       |
| CE-MRA                            | 0 (0%)     | 18 (4.4%)   | 13 (9.6%)   |       |
| DSA                               | 0 (0%)     | 6 (1.5%)    | 1 (0.7%)    |       |
| Evaluation of cardiac rhythm      |            |             |             |       |
| EKG                               | 16 (80.0%) | 387 (87.8%) | 131 (96.3%) | 0.007 |
| Holter                            | 13 (65.0%) | 325 (73.4%) | 110 (80.9%) | 0.124 |
| Evaluation of cardiac structure   |            |             |             |       |

---

|     |            |             |             |       |
|-----|------------|-------------|-------------|-------|
| TTE | 19 (95.0%) | 400 (90.1%) | 129 (94.9%) | 0.189 |
| TEE | 0 (0%)     | 0 (0%)      | 0 (0%)      | NE    |

---

LAA, large artery atherosclerosis; CE, cardiac embolism; SAO, small vessel occlusion; OE, other determined cause; UE, undetermined cause; Neuro-ICU, neurological intensive care unit; ICU, intensive care unit; West includes Inner Mongolia, Guangxi, Chongqing, Sichuan, Guizhou, Yunnan, Tibet, Shaanxi, Gansu, Qinghai, Ningxia, and Xinjiang; Middle includes Shanxi, Anhui, Jiangxi, Henan, Hubei, and Hunan; East include Beijing, Tianjin, Hebei, Shanghai, Jiangsu, Zhejiang, Fujian, Shandong, Guangdong, Hainan, Liaoning, Jilin, and Heilongjiang; IQR, interquartile range; mRS, modified Rankin Scale; BMI, body mass index; NIHSS, NIH Stroke Scale; MRA, Magnetic Resonance Angiography; CTA, Computed Tomography Angiography; DSA, Digital Subtraction Angiography; CE-MRA, Contrast-Enhanced Magnetic Resonance Angiography; TTE, transthoracic echocardiography and TEE, transoesophageal echocardiography.

**Table IV. Medication of patients categorised based on the consistency of centralised and discharge subtype in the subgroup with complete information**

| <b>Treatment</b>                                          | <b>Consistent LAA (n/N, %)</b> | <b>Centrally reassigned LAA (n/N, %)</b> | <b>Newly diagnosed LAA (n/N, %)</b> | <b>P-value</b> |
|-----------------------------------------------------------|--------------------------------|------------------------------------------|-------------------------------------|----------------|
| Discharge treatment                                       |                                |                                          |                                     |                |
| Antiplatelet                                              | 2070/2254, 91.8%               | 3708/4011, 92.5%                         | 627/664, 94.4%                      | 0.085          |
| Oral anticoagulation                                      | 4/2254, 0.2%                   | 57/4011, 1.4%                            | 6/664, 0.9%                         | <0.0001        |
| Oral anticoagulation with indications*                    | 0/1, 0%                        | 47/284, 16.6%                            | 0/0, 0%                             |                |
| Lipid-lowering in patients with dyslipidaemia             | 189/208, 90.9%                 | 288/298, 96.6%                           | 46/48, 95.8%                        |                |
| Antidiabetic in patients with diabetes                    | 464/587, 79.0%                 | 752/946, 79.5%                           | 119/150, 79.3%                      |                |
| Antihypertensive in patients with hypertension            | 894/1500, 59.6%                | 1682/2547, 66.0%                         | 287/428, 67.1%                      |                |
| <b>Treatment</b>                                          | <b>Consistent CE (n/N, %)</b>  | <b>Centrally reassigned CE (n/N, %)</b>  | <b>Newly diagnosed CE (n/N, %)</b>  | <b>P-value</b> |
| Discharge treatment                                       |                                |                                          |                                     |                |
| Antiplatelet                                              | 99/236, 42.0%                  | 136/230, 59.1%                           | 295/360, 81.9%                      | <0.0001        |
| Antiplatelet with indication within cardioembolic stroke† | 2/7, 28.6%                     | 2/4, 50.0%                               | 4/5, 80.0%                          |                |

|                                                |                                |                                          |                                     |                |
|------------------------------------------------|--------------------------------|------------------------------------------|-------------------------------------|----------------|
| Oral anticoagulation                           | 126/236, 53.4%                 | 62/230, 27.0%                            | 35/360, 9.7%                        | <0.0001        |
| Oral anticoagulation with indications*         | 122/227, 53.7%                 | 54/141, 38.3%                            | 34/234, 14.5%                       | <0.0001        |
| Lipid-lowering in patients with dyslipidaemia  | 8/8, 100.0%                    | 12/12, 100.0%                            | 23/25, 92.0%                        |                |
| Antidiabetic in patients with diabetes         | 24/32, 75.0%                   | 32/42, 76.2%                             | 64/84, 76.2%                        |                |
| Antihypertensive in patients with hypertension | 83/123, 67.5%                  | 63/122, 51.6%                            | 153/229, 66.8%                      |                |
| <b>Treatment</b>                               | <b>Consistent SVO (n/N, %)</b> | <b>Centrally reassigned SVO (n/N, %)</b> | <b>Newly diagnosed SVO (n/N, %)</b> | <b>P-value</b> |
| <b>Discharge treatment</b>                     |                                |                                          |                                     |                |
| Antiplatelet                                   | 1063/1085, 98.0%               | 1706/1782, 95.7%                         | 1381/1469, 94.0%                    | <0.0001        |
| Oral anticoagulation                           | 0/1085, 0%                     | 13/1782, 0.7%                            | 4/1469, 0.3%                        | 0.007          |
| Oral anticoagulation with indications*         | 0/0, 0%                        | 8/72, 11.1%                              | 0/0, 0%                             |                |
| Lipid-lowering in patients with dyslipidaemia  | 93/95, 97.9%                   | 121/124, 97.6%                           | 96/99, 97.0%                        |                |
| Antidiabetic in patients with diabetes         | 189/228, 82.9%                 | 322/379, 85.0%                           | 301/367, 82.0%                      |                |
| Antihypertensive in patients with hypertension | 529/689, 76.8%                 | 770/1116, 69.0%                          | 674/976, 69.1%                      |                |

| Treatment                                      | Consistent OE (n/N, %) | Centrally reassigned, OE (n/N, %) | Newly diagnosed OE (n/N, %) | P-value |
|------------------------------------------------|------------------------|-----------------------------------|-----------------------------|---------|
| Discharge treatment                            |                        |                                   |                             |         |
| Antiplatelet                                   | 14/16, 87.5%           | 313/339, 92.3%                    | 100/118, 84.8%              | 0.053   |
| Oral anticoagulation                           | 1/16, 6.3%             | 4/339, 1.2%                       | 2/118, 1.7%                 | 0.254   |
| Oral anticoagulation with indications*         | 0/0, 0%                | 1/22, 4.6%                        | 0/0, 0%                     |         |
| Lipid-lowering in patients with dyslipidaemia  | 2/16, 12.5%            | 88/339, 26.0%                     | 25/118, 21.2%               |         |
| Antidiabetic in patients with diabetes         | 4/16, 25.0%            | 183/339, 54.0%                    | 40/118, 33.9%               |         |
| Antihypertensive in patients with hypertension | 1/1, 100.0%            | 28/29, 96.6%                      | 7/7, 100.0%                 |         |

\*: Indications of oral anticoagulation treatment included mechanical prosthetic valve, mitral stenosis with atrial fibrillation, atrial fibrillation, left atrial/atrial appendage thrombus, left ventricular thrombus, and atrial flutter.

†: Indications of antiplatelet treatment within aetiologies of cardioembolic stroke included mitral valve prolapse without atrial fibrillation and mitral annulus calcification without atrial fibrillation.

LAA, large artery atherosclerosis; CE, cardiac embolism; SVO, small vessel occlusion; OE, another determined cause.



**Table V. Oral anticoagulant treatment of cardioembolic stroke patients received with unchanged and reassigned subtype in the subgroup with complete information.**

| Treatment                 | Consistent CE* (n=235)      |                            |         | Centrally reassigned CE† (n=262)   |                             |         | Newly diagnosed CE‡ (n=447)  |                             |         |
|---------------------------|-----------------------------|----------------------------|---------|------------------------------------|-----------------------------|---------|------------------------------|-----------------------------|---------|
|                           | With indication* *<br>n=225 | Without indication<br>n=10 | P value | With indication* *<br>n=161        | Without indication<br>n=101 | P value | With indication* *<br>n=300  | Without indication<br>n=147 | P-value |
| In-hospital anticoagulant | 132 (58.7%)                 | 4 (40.0%)                  | 0.329   | 75 (53.2%)                         | 18 (20.0%)                  | <0.0001 | 57 (24.5%)                   | 8 (6.3%)                    | <0.0001 |
| Warfarin                  | 78/132 59.1%                | 3/4, 75.0%                 | 0.647   | 39/75, 52.0%                       | 5/90, 27.8%                 | 0.073   | 19/57, 33.3%                 | 1/8, 12.5%                  | 0.417   |
| LWHP                      | 70/132 53.0%                | 1/4, 25.0%                 | 0.348   | 45/75, 60.0%                       | 9/18, 50.0%                 | 0.596   | 34/57, 59.7%                 | 5/8, 62.5%                  | 1.000   |
| Heparin                   | 1/132 0.8%                  | 0/4, 0%                    | 1.000   | 0/75, 0%                           | 4/18, 22.2%                 | 0.001   | 1/57, 1.8%                   | 0/8, 0%                     | 1.000   |
| Rivaroxaban               | 6/132 4.6%                  | 0/4, 0%                    | 1.000   | 2/75, 2.7%                         | 0/18, 0%                    | 1.000   | 2/57, 3.5%                   | 0/8, 0%                     | 1.000   |
| Dabigatran                | 20/132 15.2%                | 1/4, 25.0%                 | 0.493   | 4/75, 5.3%                         | 1/18, 5.6%                  | 1.000   | 3/57, 5.3%                   | 0/8, 0%                     | 1.000   |
| Apixaban                  | 0/132 0%                    | 0/4, 0%                    | NE      | 0/75, 0%                           | 0/18, 0%                    | NE      | 0/57, 0%                     | 0/8, 0%                     | NE      |
| Others                    | 3/132 2.3%                  | 0/4, 0%                    | 1.000   | 2/75, 2.7%                         | 1/18, 5.6%                  | 0.480   | 1/57, 0%                     | 2/8, 25.0%                  | 0.038   |
| Treatment                 | Consistent CE§ (n=283)      |                            |         | Centrally reassigned CE    (n=261) |                             |         | Newly diagnosed CE # (n=448) |                             |         |
|                           | With indication* *<br>n=271 | Without indication<br>n=12 | P value | With indication* *<br>n=157        | Without indication<br>n=104 | P value | With indication* *<br>n=300  | Without indication<br>n=148 | P-value |

|                         |              |            |         |               |            |         |              |             |         |
|-------------------------|--------------|------------|---------|---------------|------------|---------|--------------|-------------|---------|
| Discharge anticoagulant | 57 (24.5%)   | 8 (6.3%)   | <0.0001 | 56/139, 40.3% | 8/91, 8.8% | <0.0001 | 36 (15.5%)   | 1 (0.8%)    | <0.0001 |
| Warfarin                | 19/57, 33.3% | 1/8, 12.5% | 0.417   | 46/56, 82.1%  | 7/8, 87.5% | 1.000   | 26/36, 72.2% | 1/1, 100.0% | 1.000   |
| LWHP                    | 34/57, 59.7% | 5/8, 62.5% | 1.000   | 2/56, 3.6%    | 1/8, 12.5% | 0.335   | 2/36, 5.6%   | 0/1, 0%     | 1.000   |
| Heparin                 | 1/57, 1.8%   | 0/8, 0%    | 1.000   | 0/56, 0%      | 0/8, 0%    | NE      | 0/36, 0%     | 0/1, 0%     | NE      |
| Rivaroxaban             | 2/57, 3.5%   | 0/8, 0%    | 1.000   | 3/56, 5.4%    | 1/8, 12.5% | 0.422   | 4/36, 11.1%  | 0/1, 0%     | 1.000   |
| Dabigatran              | 3/57, 5.3%   | 0/8, 0%    | 1.000   | 5/56, 8.9%    | 0/8, 0%    | 1.000   | 4/36, 11.1%  | 0/1, 0%     | 1.000   |
| Apixaban                | 0/57, 0%     | 0/8, 0%    | NE      | 0/56, 0%      | 0/8, 0%    | NE      | 0/36, 0%     | 0/1, 0%     | NE      |
| Others                  | 1/57, 0%     | 2/8, 25.0% | 0.038   | 0/56, 0%      | 0/8, 0%    | NE      | 0/36, 0%     | 0/1, 0%     | NE      |

\*: missing data of two patients; †: missing data of two patients; ‡: missing data of one patient; §: missing data of one patient; ||: missing data of three patients;

#: missing data of one patient; \* \*: Indications of oral anticoagulation treatment included mechanical prosthetic valve, mitral stenosis with atrial fibrillation, atrial fibrillation, left atrial/atrial appendage thrombus, left ventricular thrombus, and atrial flutter; CE, cardiac embolism; LWHP, low molecular weight heparin; NE, not estimable.

### Supplementary Methods

Ischaemic stroke was defined as “brain, spinal cord, or retinal cell death attributable to ischaemia, based on neuropathological, neuroimaging, or clinical evidence of permanent injury” with overt symptoms.

#### Data collection and standard aetiological examinations

During hospitalisation at the baseline interview, all patients without contradictions to MRI examinations were recommended for a complete aetiological evaluation, according to the study protocol. All patients were recommended to undergo complete aetiological evaluation during hospitalisation, including brain magnetic resonance imaging (MRI) with diffusion-weighted imaging (DWI; 3.0T or 1.5T), intracranial artery imaging (CT/MR angiography or digital subtraction angiography), extracranial artery imaging (carotid ultrasound, CT/MR angiography or digital subtraction angiography), cardiac rhythm examination (12-lead electrocardiograph or 24-hour electrocardiograph), and cardiac structure imaging (transthoracic or transoesophageal echocardiography). The MRI test could be 3.0T or 1.5T according to the available MRI machine at each individual investigation site.

Site investigators gathered the demographic information (age, sex, living condition, etc.) and medical history (history of hypertension, diabetes, myocardial infarction, ischaemic stroke, etc.) of patients at baseline face-to-face interview and performed a standardised physical examination to record vital signs (blood pressure, etc.) and other parameters (such as National Institutes of Health Stroke Scale [NIHSS]). An interactive electronic data capture (EDC) system was developed for data collection.

Except for complete entry of typing-in data elements, including demographic characteristics, physical examination results, and medical history after a face-to-face interview when admitted to participating centres, all laboratory results, auxiliary test results, and medical records were uploaded to the EDC system after the removal of private information.

Image data, including brain MRI and vascular assessment for intracranial arteries (MRA, CTA, and DSA) or extracranial arteries (CTA and CE-MRA) were saved in DICOM format on discs which were then delivered to the centralised review centre.

#### Aetiological diagnosis

##### *Non-centralised aetiological diagnosis at participating centres*

Site investigators and raters were trained by committee-assigned stroke specialists before the initiation of patient enrolment. The investigators and raters of each study site received a manual and a videotape that included a detailed description of the Trial of Org 10172 in Acute Stroke Treatment (TOAST) subtyping system and operation guidelines to determine aetiological subtype.

Following a standard diagnostic process, the trained investigators or raters reviewed the patients' clinical, imaging, and laboratory features and categorised patients into different causative subtypes according to the TOAST system. Raters at each study site received case-based training using abstracted data from medical records. Because most of the study sites have very large neurology departments, there were many neurologists involved in patient enrolment and aetiological diagnosis at discharge. Site raters strove to reach excellent intrarater and interrater reliability ( $\kappa > 0.80$ ) before aetiological diagnosis. Intrarater and interrater reliabilities were assessed and controlled by the site investigator. However, detailed information ( $\kappa$ ) of the intrarater and interrater reliabilities were not reported to the study committee.

##### *Centralised aetiological diagnosis*

Standardised screening report forms were generated from the EDC (See Supplementary Methods, Supplementary Materials-Screening Report Form). According to the definition used by the TOAST system, we defined the phenotypic elements of each subtype as follows.

Large-artery atherosclerosis (LAA) was determined by the presence of symptomatic intracranial/extracranial artery atherosclerotic stenosis. Symptomatic stenosis was defined as severe (50%–99%) stenosis or occlusion of clinically relevant intracranial and extracranial arteries. The relevance of intracranial artery stenosis (ICAS) and the index stroke was determined by raters. ICAS judgement was based on the Warfarin-Aspirin Symptomatic Intracranial Disease (WASID) trial criteria. The North American Symptomatic Carotid Endarterectomy Trial (NASCET) criteria were adopted to adjust the stenosis of extracranial artery stenosis (ECAS).

Cardio-embolism (CE) was determined using cardio-embolic sources. Patients were screened for high-risk and medium-risk embolic sources according to the TOAST classification system.

Small-vessel occlusion (SVO) was determined by the presence of a single relevant brain stem or subcortical hemispheric lesion which was less than 1.5 cm in diameter at the widest sectional on axial diffusion-weighted imaging (DWI).

We defined the other determined aetiology (OE) subtype based on potential causative disorders. This category included rare causes, including an intrinsic disorder with arterial wall abnormality (moyamoya disease, nonatherosclerotic vasculopathy or dissection), an iatrogenic injury to a clinically relevant artery wall (such as an injury caused by endovascular treatment), and disorders of blood composition (such as disorders of the haemostatic system).

All elements competed in a hierarchical algorithm in the first gradation of comparison (See Supplementary Materials-Decision Algorithm). When there was an evident artery wall abnormality in the absence of a high-risk CE element, the causative subtype was assigned as OE. If there was a co-existing apparent artery wall abnormality and a high-risk CE element, the subtype was considered to be undetermined aetiology (UE).

In the second gradation of comparison among patients without artery wall abnormalities, if there was only one element of LAA, high-risk CE, or disorders of blood composition (indicating OE), the subtype was classified as LAA, CE, or OE, respectively. If there were multiple elements mentioned above, the subtype was classified as UE.

In patients without elements mentioned in previous gradations, when there was only one element among the medium-risk elements of CE, the elements of SVO, or the blood composition disorder element of OE, the cause was designated as CE, SVO, or OE, respectively. When none or multiple elements mentioned above existed, the subtype of the patient was designated as UE.

Senior neurologists designed standardised online screening report forms of imaging and other auxiliary test results, which allowed a double-blind double-entry mode and senior adjudication with a blind-paired comparison mode. Raters were blinded to each other's input information. Each senior adjudicator was blinded to the raters' names. By comparing the double-entry results on the report forms, a senior adjudicator would resolve the discrepancies and finalise the entry.

During two months from Oct 2018 to Nov 2018, a total of 32 neurologists and radiologists were recruited and centrally trained to analyse all brain MRI and vascular assessment data. By reviewing imaging data, they distinguished the characteristics necessary for aetiologic classification, such as infarction pattern, location, blood supply, and stenosis of arteries, and entered the relevant information into online screening report forms. Using anonymous imaging data from 120 patients, we evaluated the interrater reproducibility for multiple raters. After a systematic comparison of entry fields within the screening report forms, we assessed the agreement and scheduled any necessary retraining. Daily feedback of difficult situations from all image analysers was received and answered by the senior analyser in a timely manner. Imaging interpretation started after excellent interrater reproducibility was achieved. From January 2019 to May 2019, a total of 10 senior radiologists from the previous 32 raters re-examined all imaging data and corrected inaccurate information within the relevant online forms for quality control. Another senior radiologist resolved any discrepancies between the senior analysers.

Fifty-seven neurologists, each with more than 5 years of clinical experience, were recruited to review auxiliary test results and to enter specific relevant parameters into the online screening report form. During data entry, the senior analyser for the group resolved disagreements among the entry fields.

Another sixteen neurologists with more than 5 years of clinical experience reviewed discharge summary screenings for any supplementary information that was essential for subtyping, such as diagnosis of a specific disease as the direct cause of ischaemic stroke, and entered these onto the online screening report form. The senior analyser for the group resolved disagreements among the entry fields.

Finally, the complete data within the screening report forms were automatically compared by the online system, and discrepancies between the two forms were resolved by a third senior analyser.

**Supplementary Materials-Screening Report Form (separate file)**

**Supplementary Materials-Decision Algorithm (separate file)**
