# Supplementary figures and images for: Inconsistent centralised versus non-centralised ischaemic stroke aetiology
Source: HighWire-hosted journal article supplement (doi:10.1136/svn-2020-000576), 2020-11-05

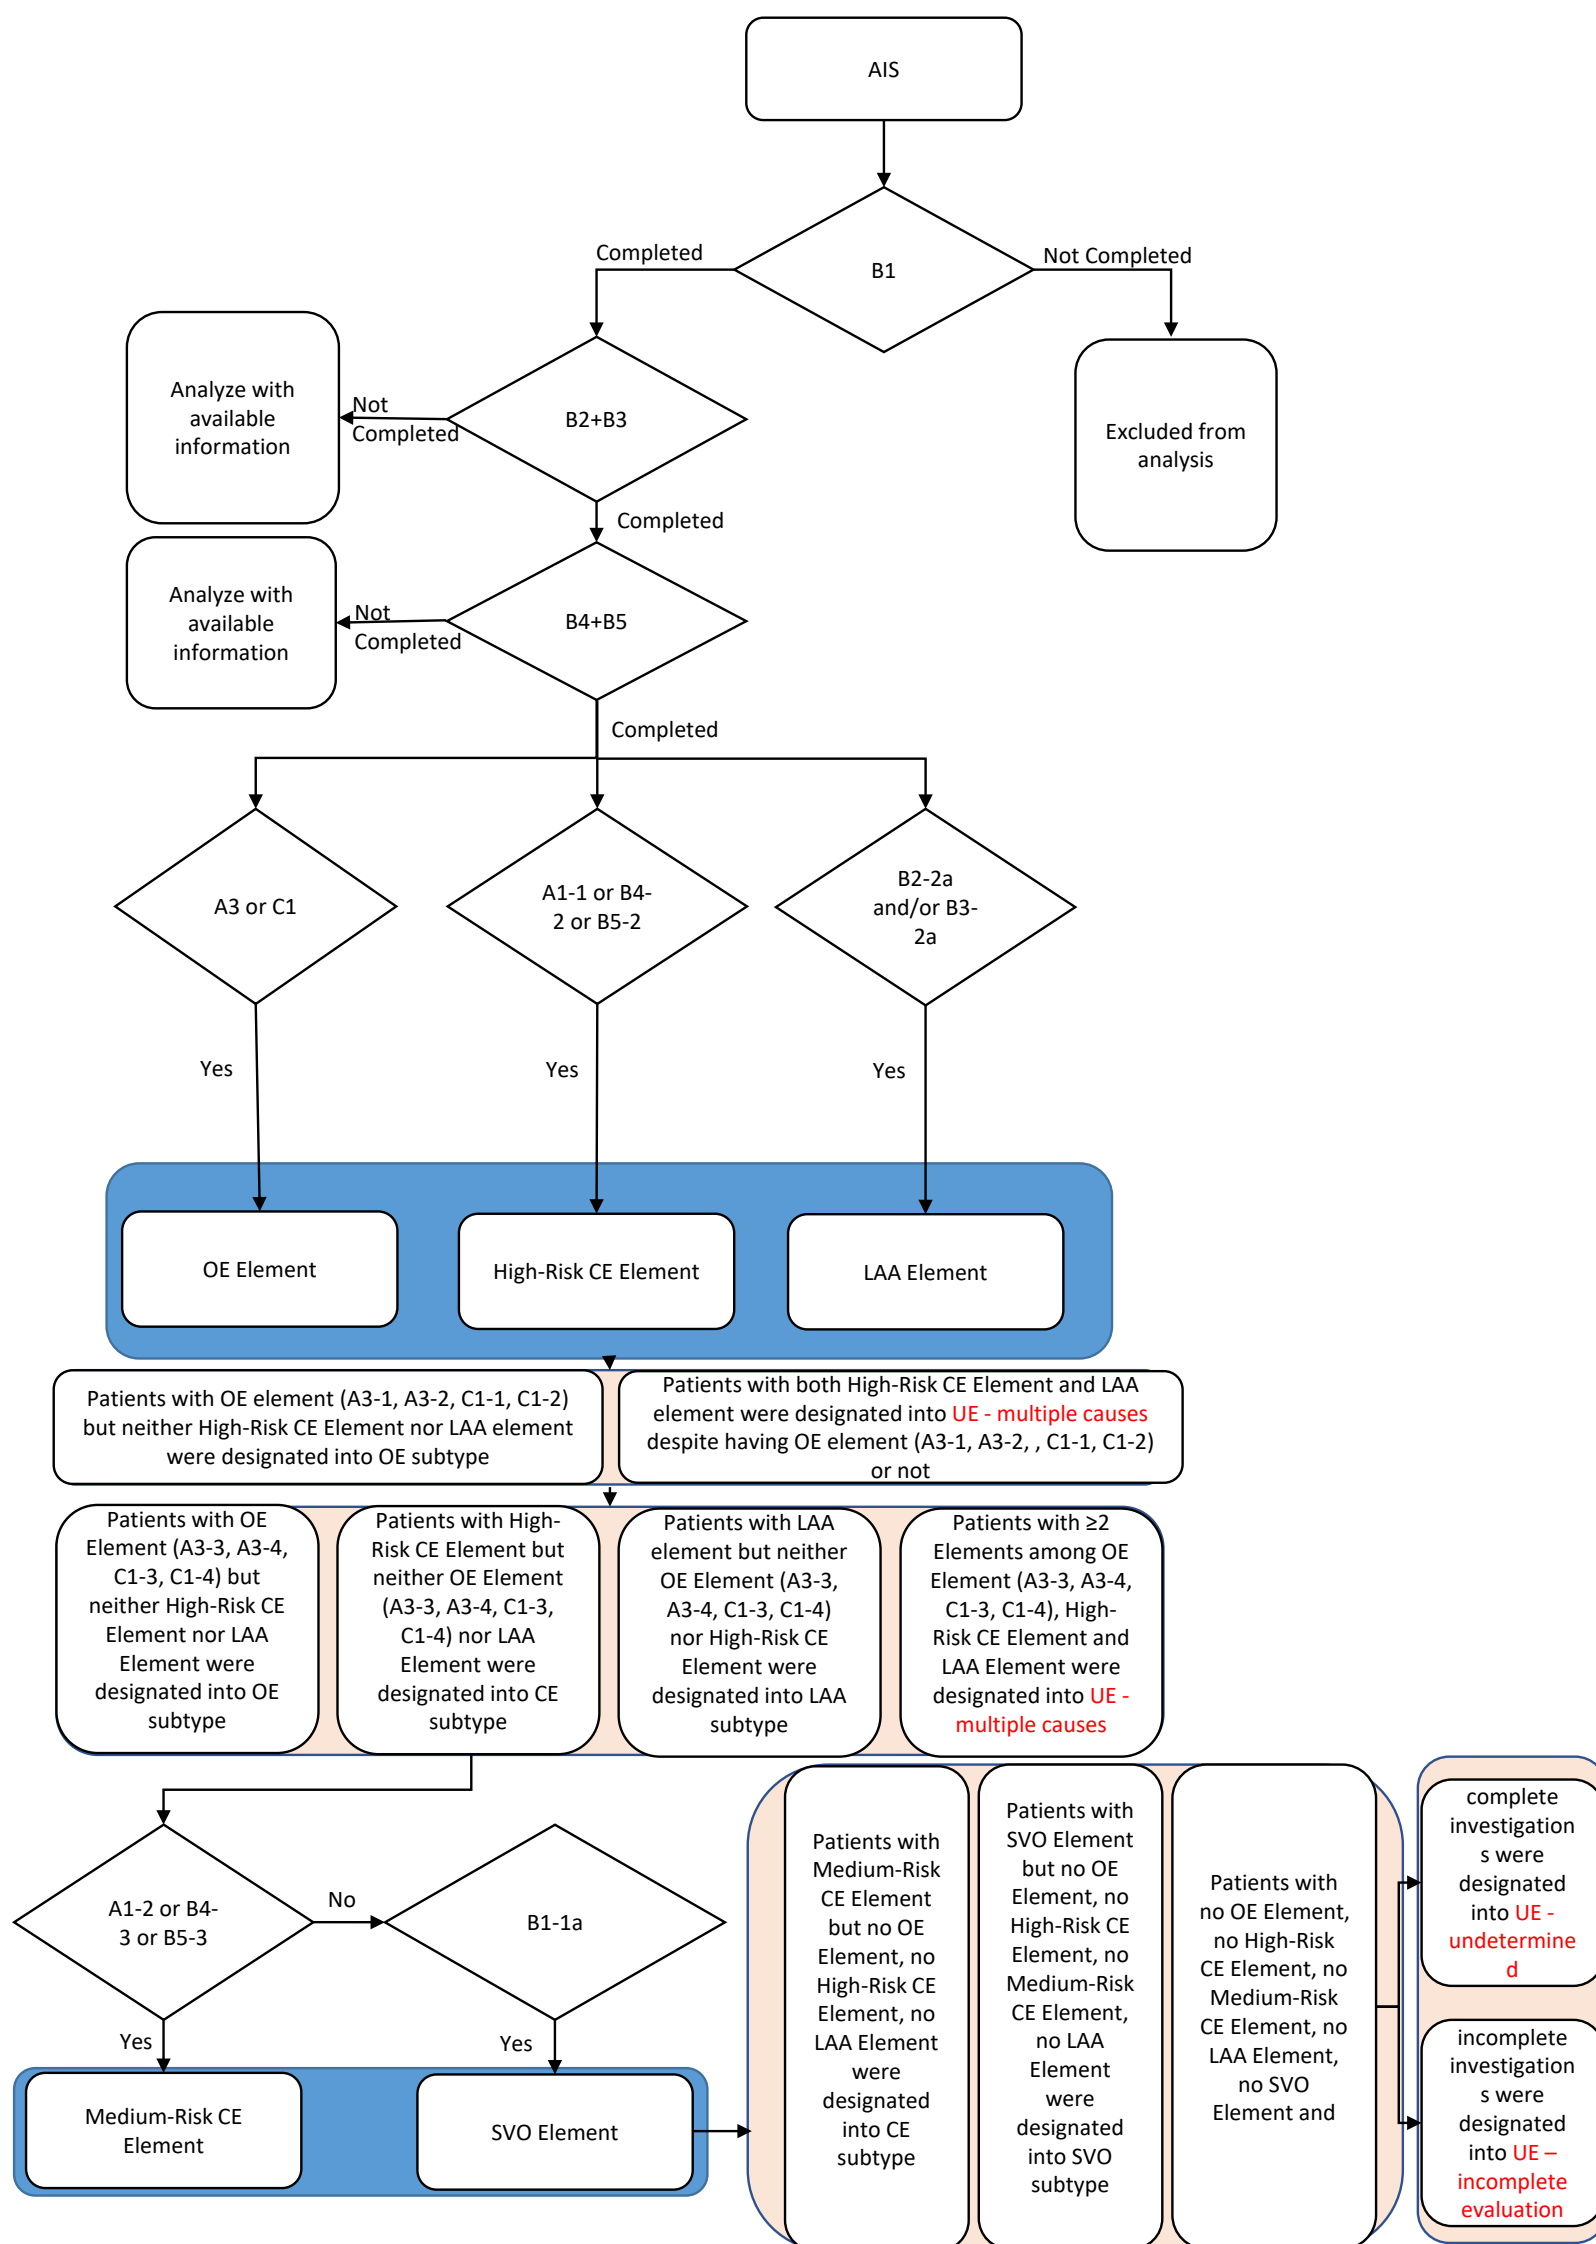

Supplement: svn-2020-000576supp002_data_supplement.pdf [file svn-2020-000576supp002_data_supplement.pdf]
